# Supplementary material
Source: publisher site journal article supplement (https://spandidos-publications.com/6167/downloadSupplementary)

Figure S1. Representative plots for the flow cytometry data presented in Fig. 4I and J; KMT5C, lysine methyltransferase 5C; shRNA, short hairpin RNA.

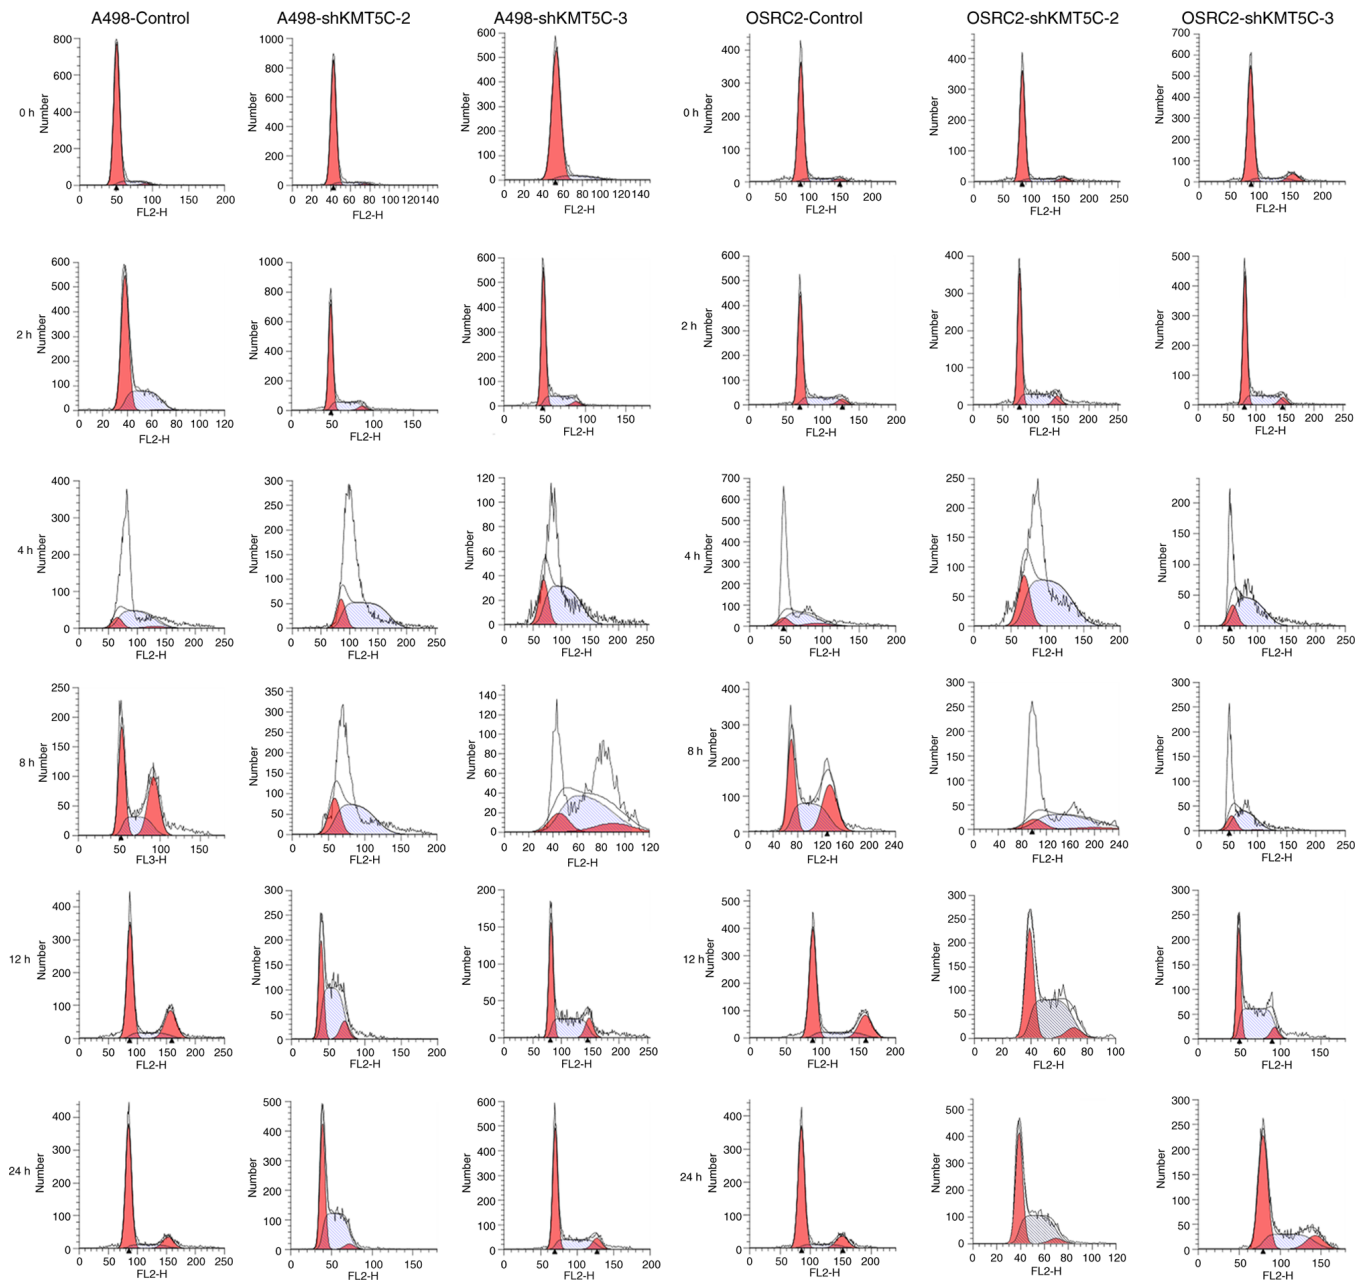

Supplement: Supplementary file 1 [file downloadSupplementary]
